# Supplementary material
Source: PubMed Central journal article supplement (PMC6325345)
Supplement: jiy336_suppl_supplementary_figure_1.pdf [file jiy336_suppl_supplementary_figure_1.pdf]

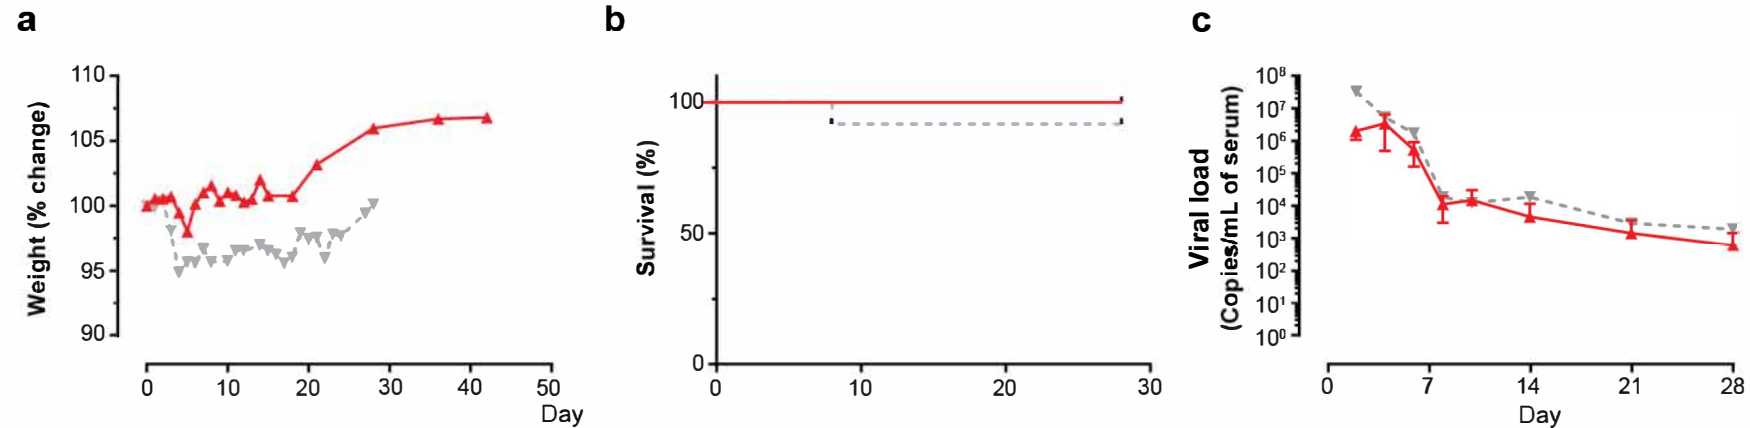

FIGURE S1: Clinical parameters of male  $IFNAR^{-/-}$  mice from the first experiment.

**a)** Percent of weight change, **b)** survival and **c)** viral load in serum of the ZIKV group from the first ( $\blacktriangle$ ) and second experiments ( $\blacktriangle$ ) of male  $IFNAR^{-/-}$  mice.
